# Supplementary material for: Impact of Lactic Acid Bacteria Fermentation on Phenolic Compounds and Antioxidant Activity of Avocado Leaf Extracts
Source: MDPI journal article supplement (doi:10.3390/antiox12020298), 2023-01-28
Supplement: s1 [file s1]

## Supplementary tables and figures

**Table S1. Log CFU/ml of lactic acid bacteria in avocado leaves**

|                                   | Log CFU/ml $\pm$ SD |                 |                 |                 |                 |
|-----------------------------------|---------------------|-----------------|-----------------|-----------------|-----------------|
|                                   | 0 h                 | 24 h            | 48 h            | 72 h            | 96 h            |
| <i>P. acidilactici</i> CECT 5765T | 7.93 $\pm$ 0.03     | 7.86 $\pm$ 0.01 | 7,68 $\pm$ 0.05 | 7.75 $\pm$ 0.06 | 7.20 $\pm$ 0.07 |
| <i>P. acidilactici</i> CECT 98    | 7.81 $\pm$ 0.08     | 7.47 $\pm$ 0.04 | 7.31 $\pm$ 0.05 | 6.66 $\pm$ 0.04 | 6.36 $\pm$ 0.06 |
| <i>P. pentosaceus</i> CECT 4695T  | 7.25 $\pm$ 0.05     | 6.50 $\pm$ 0.03 | 6,36 $\pm$ 0.06 | 5.08 $\pm$ 0.04 | 4.25 $\pm$ 0.05 |
| <i>P. pentosaceus</i> CECT 923    | 7.72 $\pm$ 0.05     | 6.50 $\pm$ 0.03 | 6.35 $\pm$ 0.06 | 5.08 $\pm$ 0.04 | 4.25 $\pm$ 0.05 |
| <i>L. mesenteroides</i> CECT 219T | 7.23 $\pm$ 0.08     | 6.26 $\pm$ 0.06 | 5.37 $\pm$ 0.06 | 5.07 $\pm$ 0.04 | 5.64 $\pm$ 0.05 |
| <i>L. mesenteroides</i> CECT 215  | 4.30 $\pm$ 0.04     | 2.81 $\pm$ 0.13 | 5.21 $\pm$ 0.04 | 2.77 $\pm$ 0.07 | 1.09 $\pm$ 0.09 |
| <i>L. brevis</i> CECT 4121T       | 8.45 $\pm$ 0.08     | 6.72 $\pm$ 0.03 | 6.63 $\pm$ 0.02 | 6.09 $\pm$ 0.05 | 5.36 $\pm$ 0.05 |
| <i>L. brevis</i> CECT 5354        | 6.38 $\pm$ 0.04     | 5.24 $\pm$ 0.05 | 5.48 $\pm$ 0.06 | 5.21 $\pm$ 0.08 | 5.13 $\pm$ 0.05 |
| <i>L. plantarum</i> CECT 748T     | 7.94 $\pm$ 0.04     | 8.44 $\pm$ 0.01 | 8.41 $\pm$ 0.05 | 8,30 $\pm$ 0.18 | 8.15 $\pm$ 0.14 |
| <i>L. plantarum</i> CECT 9567     | 7.98 $\pm$ 0.02     | 6.79 $\pm$ 0.00 | 8.45 $\pm$ 0.02 | 8.48 $\pm$ 0.10 | 8.15 $\pm$ 0.14 |

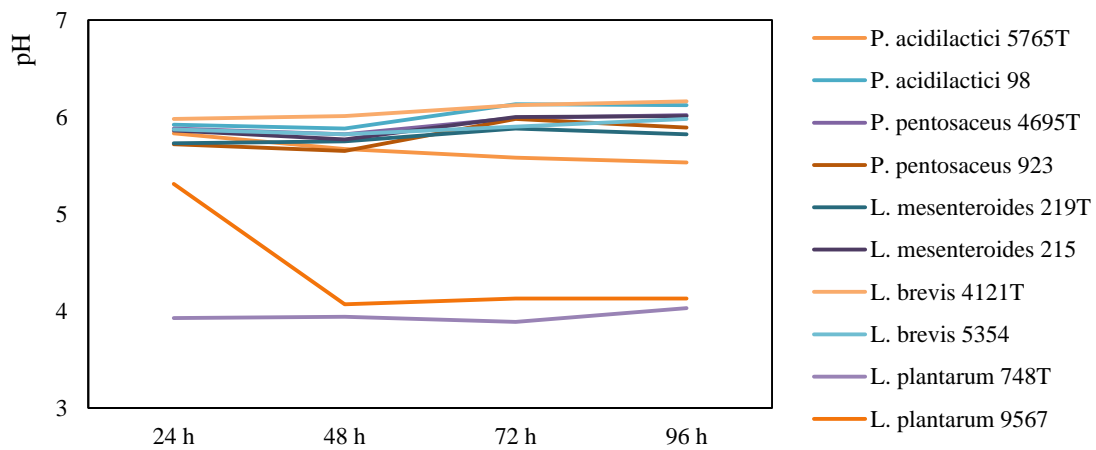

**Figure S1. pH values of lactic acid bacteria cultures during fermentation of avocado leaves**

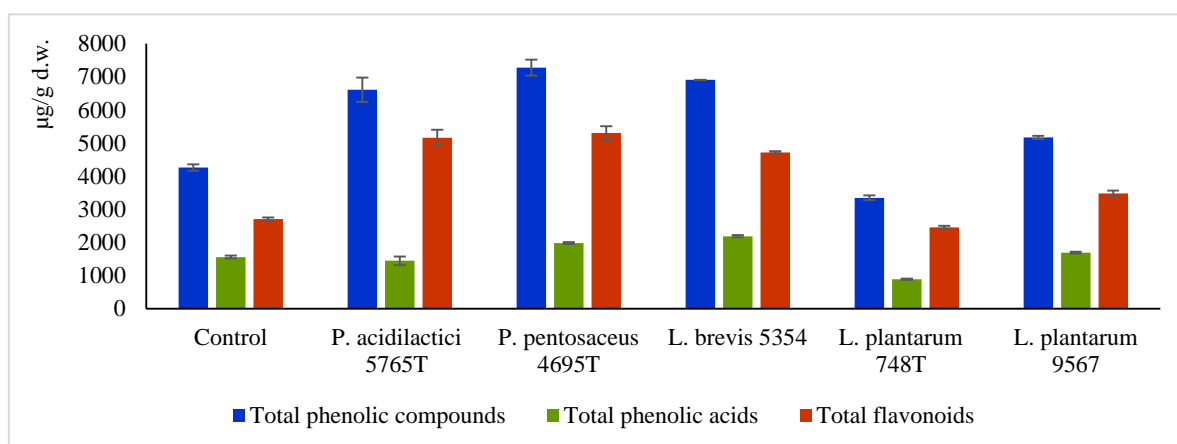

Figure S2. Phenolic profile in fermented and unfermented avocado leaves by HPLC-ESI-TOF-MS.
